# Supplementary material for: Systematic Assessment of Human CCR7 Signalling Using NanoBRET Biosensors Points towards the Importance of the Cellular Context
Source: MDPI journal article supplement (doi:10.3390/bios14030142), 2024-03-14
Supplement: s1 [file s1]

**Supplemental Table S1. Overview of ligand preference at CCR7.** Ligand preference ( $\Delta\text{Log}(E_{\text{max}}/EC50)$ ) with CCL19 as a reference was calculated by subtracting  $\text{Log}(E_{\text{max}}/EC50)$  in each pathway. Data are representative of the mean and SD of three to six independent experiments. SD values were calculated through standard propagation of error. Differences between CCL19 and CCL21 were analysed using an unpaired t-test with Welch's correction. \* and \*\* represent  $P < 0.05$  and  $0.01$  respectively.

| Cell type | Ligand      | Gai1         | Gai2         | Gai3         | GaoA         | GaoB         | Gaq          | Gα12         | Gα13         | Gα15                  | GasS         | GasL         | Arrβ1                 | Arrβ2                  |
|-----------|-------------|--------------|--------------|--------------|--------------|--------------|--------------|--------------|--------------|-----------------------|--------------|--------------|-----------------------|------------------------|
| HEK293A   | CCL19 (ref) | 0.00 ± 0.08  | 0.00 ± 0.22  | 0.00 ± 0.23  | 0.00 ± 0.18  | 0.00 ± 0.30  | n.d.         | 0.00 ± 0.35  | n.d.         | <b>0.00 ± 0.33 *</b>  | n.d.         | 0.00 ± 0.63  | 0.00 ± 0.18           | <b>0.00 ± 0.16 *</b>   |
|           | CCL21       | -0.19 ± 0.41 | -0.27 ± 0.28 | -0.30 ± 0.17 | -0.37 ± 0.15 | -0.54 ± 0.38 | n.d.         | -0.43 ± 0.28 | n.d.         | <b>-0.84 ± 0.26 *</b> | n.d.         | -0.49 ± 0.63 | -0.31 ± 0.21          | <b>-0.54 ± 0.12 *</b>  |
| U87       | CCL19 (ref) | 0.00 ± 0.48  | 0.00 ± 0.12  | 0.00 ± 0.28  | 0.00 ± 0.29  | 0.00 ± 0.08  | 0.00 ± 0.96  | 0.00 ± 0.26  | 0.00 ± 0.47  | n.d.                  | 0.00 ± 0.55  | 0.00 ± 1.79  | <b>0.00 ± 0.33 *</b>  | <b>0.00 ± 0.21 **</b>  |
|           | CCL21       | -0.28 ± 0.65 | -0.37 ± 0.30 | -0.29 ± 0.33 | -0.27 ± 0.52 | -0.33 ± 0.20 | -0.44 ± 0.83 | -0.33 ± 0.44 | 0.02 ± 0.75  | n.d.                  | -0.20 ± 0.63 | 0.13 ± 1.82  | <b>-0.96 ± 0.27 *</b> | <b>-0.87 ± 0.21 **</b> |
| CHO-K1    | CCL19 (ref) | 0.00 ± 0.13  | 0.00 ± 0.54  | 0.00 ± 0.28  | 0.00 ± 0.52  | 0.00 ± 0.32  | 0.00 ± 0.92  | n.d.         | 0.00 ± 0.97  | 0.00 ± 1.35           | 0.00 ± 0.40  | 0.00 ± 1.08  | 0.00 ± 0.34           | 0.00 ± 0.38            |
|           | CCL21       | -0.21 ± 0.36 | 0.31 ± 0.56  | -0.01 ± 0.39 | -0.11 ± 0.46 | -0.06 ± 0.51 | -0.51 ± 1.01 | n.d.         | -0.40 ± 0.97 | -1.30 ± 1.00          | -0.52 ± 0.34 | n.d.         | -0.41 ± 0.33          | -0.44 ± 0.39           |

**Supplemental Table S2. Overview of system preference at CCR7.** System preference ( $\Delta\text{Log}(E_{\text{max}}/\text{EC50})$ ) were calculated for each ligand by subtracting the  $\text{Log}(E_{\text{max}}/\text{EC50})$  value of a reference system from all other systems for each transducer and each ligand (Eq. 5). Data are representative of the mean and SD of three to six independent experiments. SD values were calculated through standard propagation of error. A one-way ANOVA followed by a Dunnett multiple comparison was used to assess the preference of a system to the reference. \* and \*\* represent  $P < 0.05$  and  $0.01$  respectively.

| Transducer | Cell type | HEK293A (ref)         |                       | U87 (ref)            |                      | CHO-K1 (ref)          |                        |
|------------|-----------|-----------------------|-----------------------|----------------------|----------------------|-----------------------|------------------------|
|            |           | CCL19                 | CCL21                 | CCL19                | CCL21                | CCL19                 | CCL21                  |
| Gai1       | HEK293A   | 0.00 ± 0.08           | 0.00 ± 0.58           | 0.35 ± 0.35          | 0.43 ± 0.68          | 0.09 ± 0.11           | 0.10 ± 0.54            |
|            | U87       | -0.35 ± 0.35          | -0.43 ± 0.68          | 0.00 ± 0.48          | 0.00 ± 0.77          | -0.26 ± 0.35          | -0.33 ± 0.65           |
|            | CHO-K1    | -0.09 ± 0.11          | -0.10 ± 0.54          | 0.26 ± 0.35          | 0.33 ± 0.65          | 0.00 ± 0.13           | 0.00 ± 0.49            |
| Gai2       | HEK293A   | 0.00 ± 0.22           | 0.00 ± 0.33           | 0.48 ± 0.18          | 0.58 ± 0.37          | 0.40 ± 0.41           | -0.18 ± 0.47           |
|            | U87       | -0.48 ± 0.18          | -0.58 ± 0.37          | 0.00 ± 0.12          | 0.00 ± 0.41          | -0.08 ± 0.39          | -0.76 ± 0.50           |
|            | CHO-K1    | -0.40 ± 0.41          | 0.18 ± 0.47           | 0.08 ± 0.39          | 0.76 ± 0.50          | 0.00 ± 0.54           | 0.00 ± 0.57            |
| Gai3       | HEK293A   | 0.00 ± 0.23           | 0.00 ± 0.06           | <b>0.75 ± 0.26 *</b> | 0.74 ± 0.26          | <b>0.81 ± 0.26 *</b>  | 0.52 ± 0.34            |
|            | U87       | <b>-0.75 ± 0.26 *</b> | <b>-0.74 ± 0.26 *</b> | 0.00 ± 0.28          | 0.00 ± 0.37          | 0.06 ± 0.28           | -0.22 ± 0.43           |
|            | CHO-K1    | <b>-0.81 ± 0.26 *</b> | -0.52 ± 0.34          | -0.06 ± 0.28         | 0.22 ± 0.43          | 0.00 ± 0.28           | 0.00 ± 0.48            |
| GaoA       | HEK293A   | 0.00 ± 0.18           | 0.00 ± 0.12           | -0.28 ± 0.25         | -0.39 ± 0.48         | <b>-1.05 ± 0.39 *</b> | <b>-1.31 ± 0.29 **</b> |
|            | U87       | 0.28 ± 0.25           | 0.39 ± 0.48           | 0.00 ± 0.29          | 0.00 ± 0.67          | -0.77 ± 0.42          | <b>-0.92 ± 0.55 *</b>  |
|            | CHO-K1    | <b>1.05 ± 0.39 **</b> | <b>1.31 ± 0.29 **</b> | 0.77 ± 0.42          | 0.92 ± 0.55          | 0.00 ± 0.52           | 0.00 ± 0.39            |
| GaoB       | HEK293A   | 0.00 ± 0.30           | 0.00 ± 0.45           | 0.06 ± 0.22          | -0.15 ± 0.37         | -0.08 ± 0.31          | -0.57 ± 0.56           |
|            | U87       | -0.06 ± 0.22          | 0.15 ± 0.37           | 0.00 ± 0.08          | 0.00 ± 0.27          | -0.15 ± 0.23          | -0.42 ± 0.50           |
|            | CHO-K1    | 0.08 ± 0.31           | 0.57 ± 0.56           | 0.15 ± 0.23          | 0.42 ± 0.50          | 0.00 ± 0.32           | 0.00 ± 0.65            |
| Gaq        | HEK293A   | n.d.                  | n.d.                  | n.d.                 | n.d.                 | n.d.                  | n.d.                   |
|            | U87       | n.d.                  | n.d.                  | 0.00 ± 0.96          | 0.00 ± 0.66          | -0.42 ± 0.94          | -0.35 ± 0.90           |
|            | CHO-K1    | n.d.                  | n.d.                  | 0.42 ± 0.94          | 0.35 ± 0.90          | 0.00 ± 0.92           | 0.00 ± 1.09            |
| Gai2       | HEK293A   | 0.00 ± 0.35           | 0.00 ± 0.19           | -0.37 ± 0.31         | -0.47 ± 0.42         | n.d.                  | <b>-0.80 ± 0.15 *</b>  |
|            | U87       | 0.37 ± 0.31           | 0.47 ± 0.42           | 0.00 ± 0.26          | 0.00 ± 0.57          | n.d.                  | -0.33 ± 0.41           |
|            | CHO-K1    | n.d.                  | <b>0.80 ± 0.15 *</b>  | n.d.                 | 0.33 ± 0.41          | n.d.                  | 0.00 ± 0.10            |
| Gai3       | HEK293A   | n.d.                  | n.d.                  | n.d.                 | n.d.                 | n.d.                  | n.d.                   |
|            | U87       | n.d.                  | n.d.                  | 0.00 ± 0.47          | 0.00 ± 0.95          | -0.12 ± 0.76          | 0.31 ± 0.96            |
|            | CHO-K1    | n.d.                  | n.d.                  | 0.12 ± 0.76          | -0.31 ± 0.96         | 0.00 ± 0.97           | 0.00 ± 0.97            |
| Gai5       | HEK293A   | 0.00 ± 0.33           | 0.00 ± 0.15           | n.d.                 | n.d.                 | -1.02 ± 0.99          | -0.56 ± 0.31           |
|            | U87       | n.d.                  | n.d.                  | n.d.                 | n.d.                 | n.d.                  | n.d.                   |
|            | CHO-K1    | 1.02 ± 0.99           | <b>0.56 ± 0.31 *</b>  | n.d.                 | n.d.                 | 0.00 ± 1.35           | 0.00 ± 0.41            |
| GasS       | HEK293A   | n.d.                  | 0.00 ± 0.75           | n.d.                 | -0.98 ± 0.73         | n.d.                  | -0.56 ± 0.56           |
|            | U87       | n.d.                  | 0.98 ± 0.73           | 0.00 ± 0.55          | 0.00 ± 0.70          | 0.10 ± 0.48           | 0.42 ± 0.53            |
|            | CHO-K1    | n.d.                  | 0.56 ± 0.56           | -0.10 ± 0.48         | -0.42 ± 0.53         | 0.00 ± 0.40           | 0.00 ± 0.27            |
| GasL       | HEK293A   | 0.00 ± 0.63           | 0.00 ± 0.63           | -1.43 ± 1.34         | -2.05 ± 1.38         | -1.39 ± 0.88          | n.d.                   |
|            | U87       | 1.43 ± 1.34           | 2.05 ± 1.38           | 0.00 ± 1.79          | 0.00 ± 1.85          | 0.04 ± 1.48           | n.d.                   |
|            | CHO-K1    | 1.39 ± 0.88           | n.d.                  | -0.04 ± 1.48         | n.d.                 | 0.00 ± 1.08           | n.d.                   |
| Arrβ1      | HEK293A   | 0.00 ± 0.18           | 0.00 ± 0.24           | -0.39 ± 0.26         | 0.26 ± 0.22          | -0.45 ± 0.27          | -0.34 ± 0.28           |
|            | U87       | 0.39 ± 0.26           | -0.26 ± 0.22          | 0.00 ± 0.33          | 0.00 ± 0.19          | -0.06 ± 0.33          | -0.61 ± 0.26           |
|            | CHO-K1    | 0.45 ± 0.27           | 0.34 ± 0.28           | 0.06 ± 0.33          | <b>0.61 ± 0.26 *</b> | 0.00 ± 0.34           | 0.00 ± 0.32            |
| Arrβ2      | HEK293A   | 0.00 ± 0.16           | 0.00 ± 0.07           | -0.27 ± 0.18         | 0.06 ± 0.16          | -0.53 ± 0.29          | -0.63 ± 0.29           |
|            | U87       | 0.27 ± 0.18           | -0.06 ± 0.16          | 0.00 ± 0.21          | 0.00 ± 0.22          | -0.25 ± 0.31          | -0.69 ± 0.32           |
|            | CHO-K1    | <b>0.53 ± 0.29 *</b>  | <b>0.63 ± 0.29 *</b>  | 0.25 ± 0.31          | <b>0.69 ± 0.32 *</b> | 0.00 ± 0.38           | 0.00 ± 0.40            |

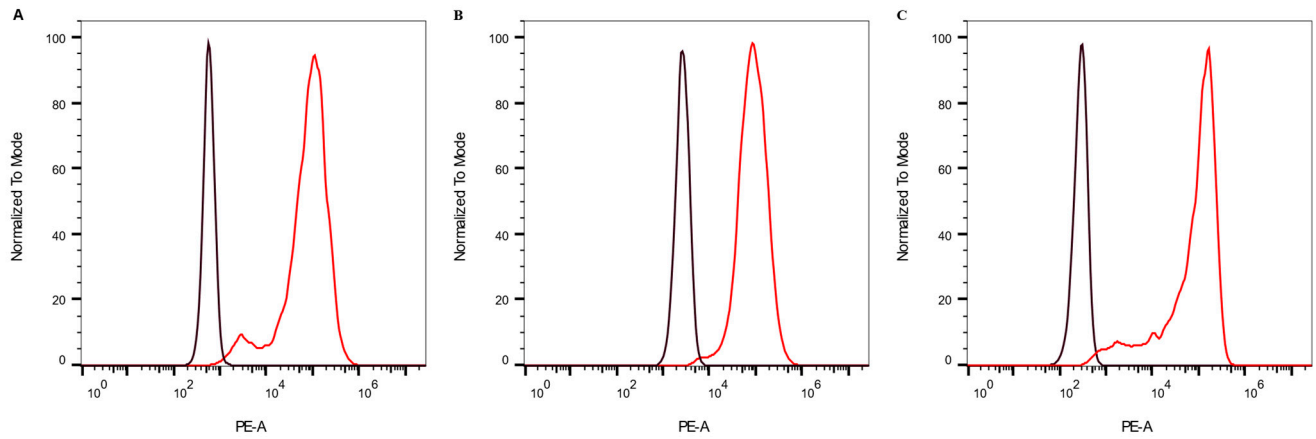

**Supplementary Figure S1. CCR7 expression in different cell lines.** (A) HEK293A, (B) U87, and (C) CHO-K1 cells stably expressing CCR7 were stained with PE Mouse anti-Human CCR7 (red) or PE Mouse IgG2a  $\kappa$  Isotype Control (black) and receptor expression was quantified using flow cytometry.

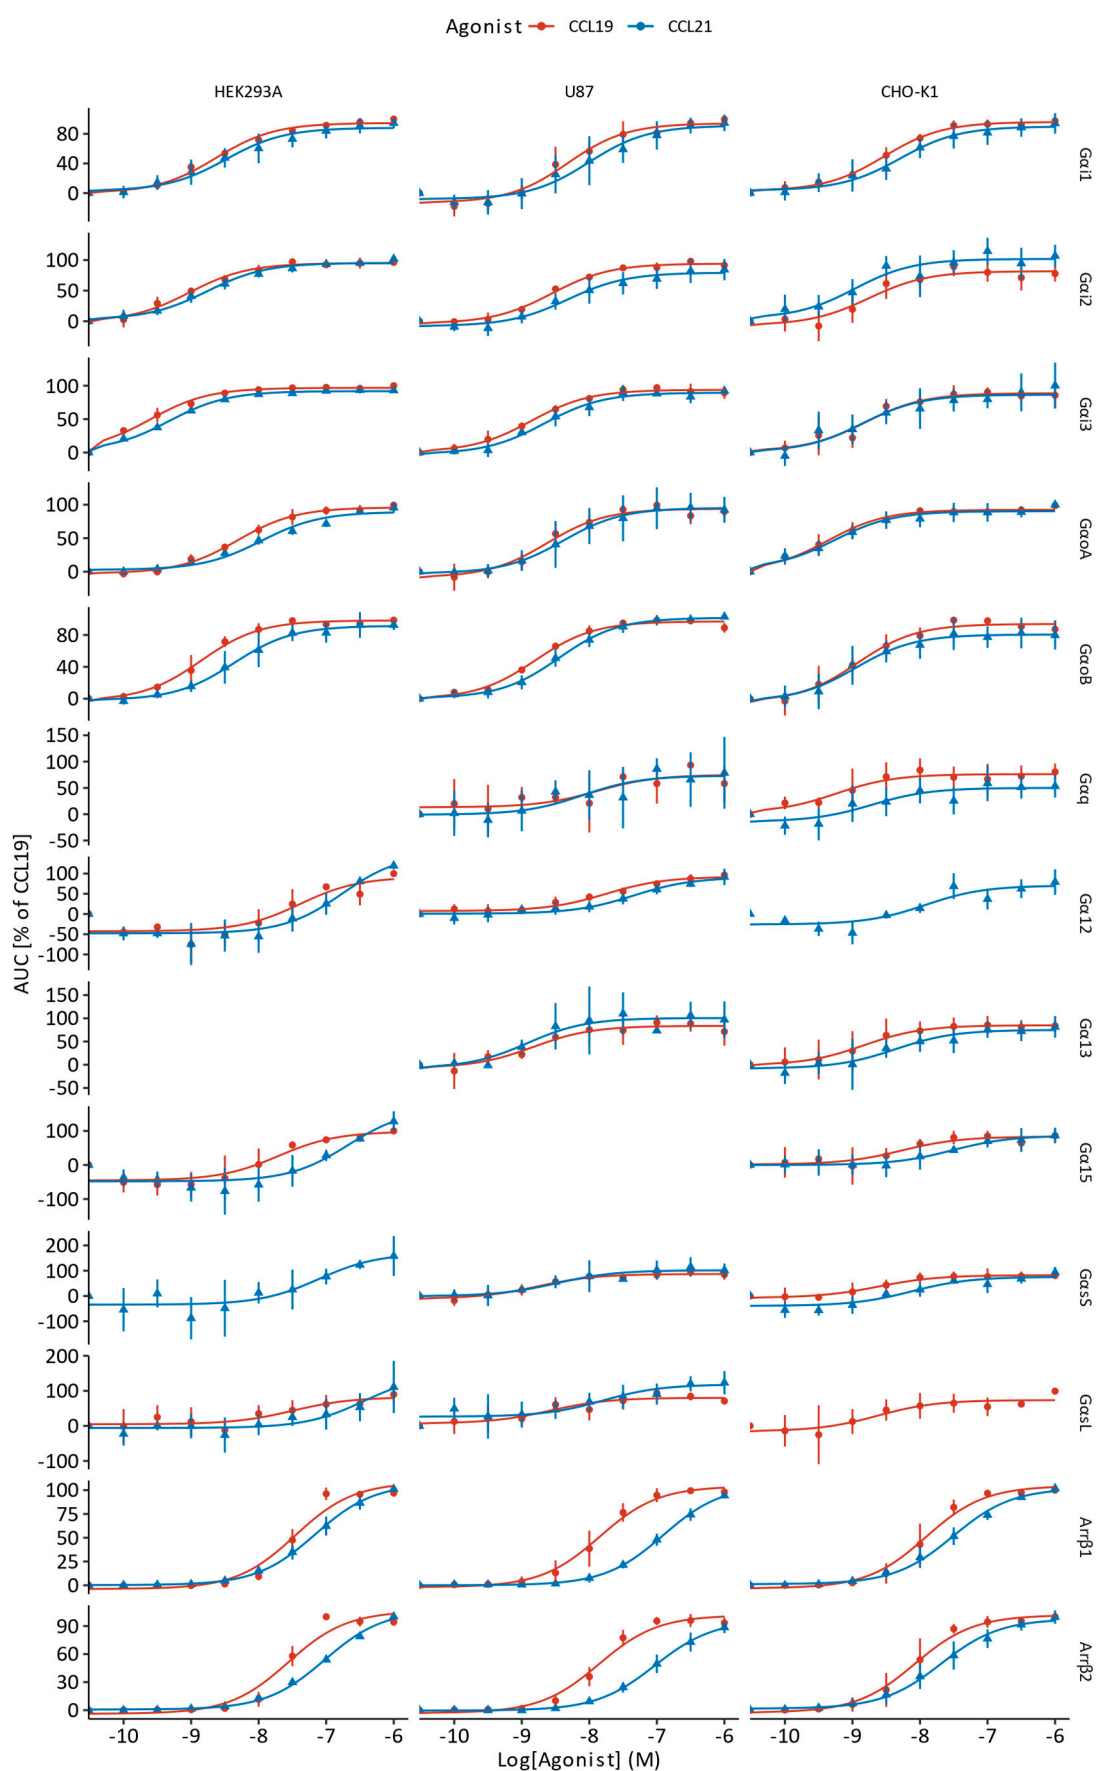

**Supplementary Figure S2. Transducer activation and recruitment by CCR7.** G protein dissociation and  $\beta$ -arrestin recruitment was measured in response to CCL19 (red) and CCL21 (blue) in HEK293A, U87 and CHO-K1 cells. Data are represented as the mean and SD of three to six independent experiments, each with three technical replicates. Curves were fit to a four-parameter non-linear regression model with the slope fixed to -1. Only data which showed significant activation or recruitment as determined by one-way ANOVA are shown.

A

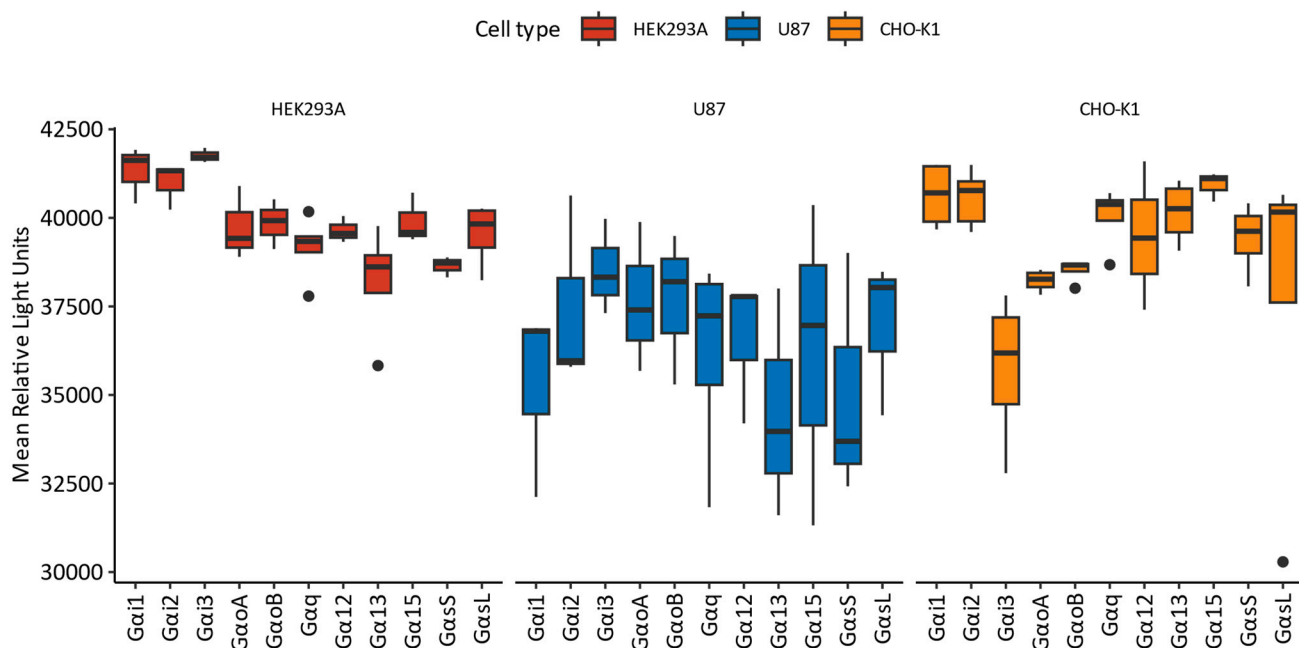

B

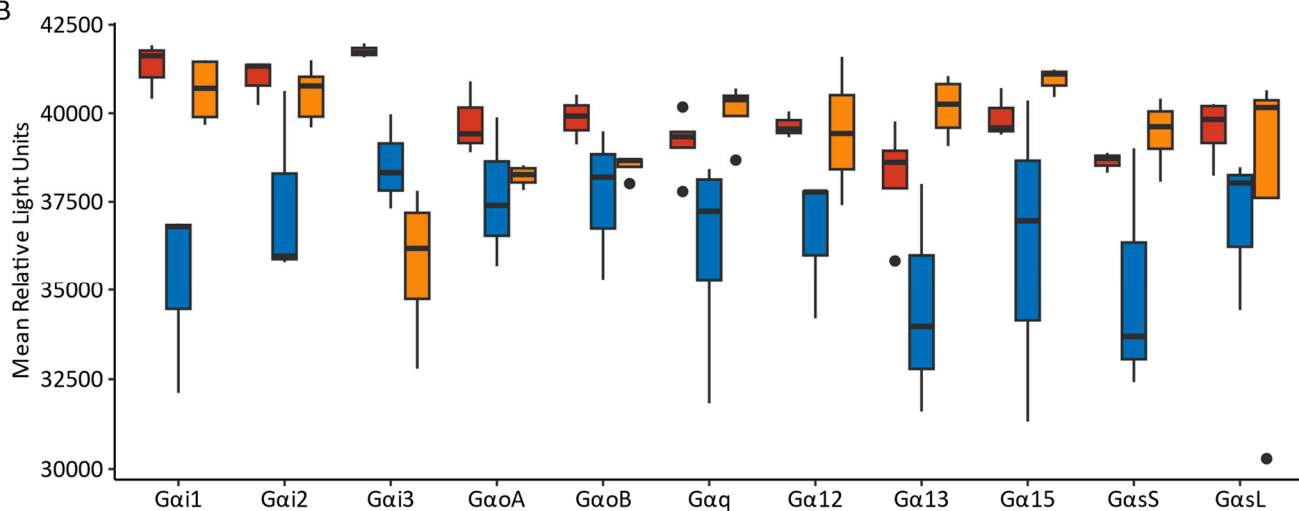

**Supplementary Figure S3. G protein expression levels between transducers and cell lines.** Comparison between mean relative light units (RLU) prior to ligand stimulation as a proxy for G protein expression between (A) G proteins within a single cell type or (B) a G protein across cell types. (A-B) Data are represented as the mean and SD of three to six independent experiments.
